# Supplementary material for: An RNA-targeting CRISPR–Cas13d system alleviates disease-related phenotypes in Huntington’s disease models
Source: PubMed Central journal article supplement (PMC9829537; doi:10.1038/s41593-022-01207-1), 2022-12-12

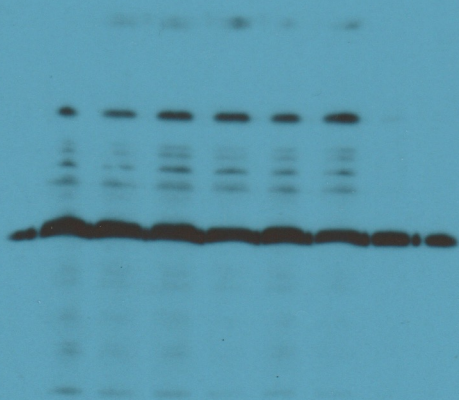

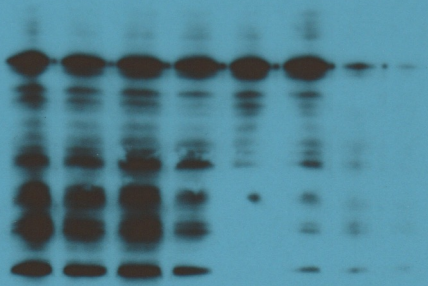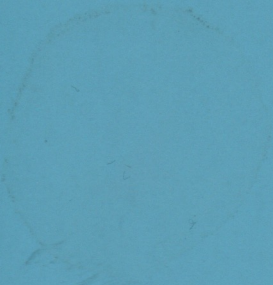

Supplement: 41593_2022_1207_MOESM15_ESM.pdf [file 41593_2022_1207_MOESM15_ESM.pdf]
