# Supplementary material for: An RNA-targeting CRISPR–Cas13d system alleviates disease-related phenotypes in Huntington’s disease models
Source: PubMed Central journal article supplement (PMC9829537; doi:10.1038/s41593-022-01207-1), 2022-12-12

Q175/+ Cas13d/NT  
Q175/+ Cas13d/NT  
Q175/+ Cas13d/NT  
Q175/+ Cas13d/NT  
Q175/+ Cas13d/CAG<sup>EX</sup>  
Q175/+ Cas13d/CAG<sup>EX</sup>

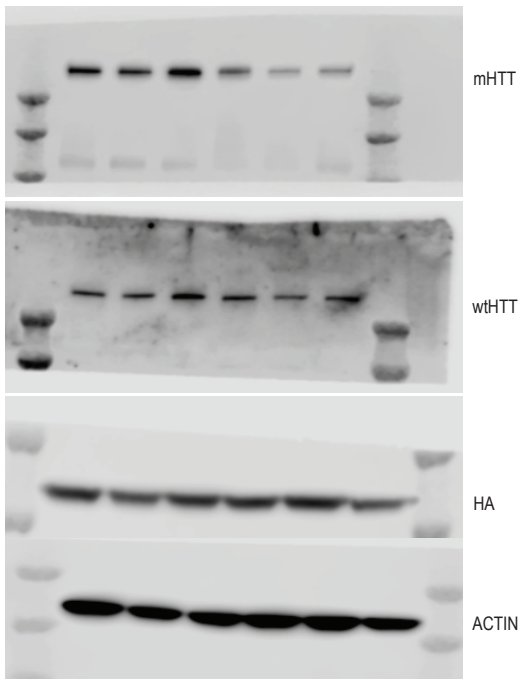

WT Cas13d/NT  
WT Cas13d/NT  
WT Cas13d/NT  
WT Cas13d/CAG<sup>Ex</sup>  
WT Cas13d/CAG<sup>Ex</sup>  
WT Cas13d/CAG<sup>Ex</sup>

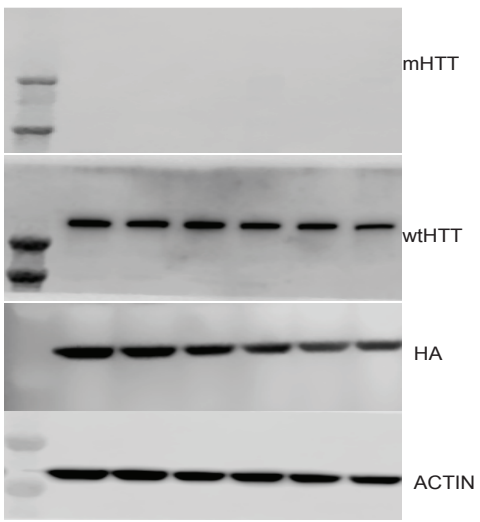

Supplement: 41593_2022_1207_MOESM19_ESM.pdf [file 41593_2022_1207_MOESM19_ESM.pdf]
